# Supplementary material
Source: HighWire-hosted journal article supplement (https://cmaj.ca/highwire/filestream/59352/field_highwire_adjunct_files/0/141614-guide-at-1.pdf)
Supplement: 141614-guide-at-1.pdf [file 141614-guide-at-1.pdf]

**Appendix 1: Levels of evidence and classification of recommendations\***

|                                                                                                                           | Class (size) of treatment effect; nature of recommendation and evidence*                                                                                                                              |                                                                                                                                                                                                                             |                                                                                                                                                                                                                     |                                                                                                                                                                                                                              |
|---------------------------------------------------------------------------------------------------------------------------|-------------------------------------------------------------------------------------------------------------------------------------------------------------------------------------------------------|-----------------------------------------------------------------------------------------------------------------------------------------------------------------------------------------------------------------------------|---------------------------------------------------------------------------------------------------------------------------------------------------------------------------------------------------------------------|------------------------------------------------------------------------------------------------------------------------------------------------------------------------------------------------------------------------------|
| Estimate of certainty (level of evidence)                                                                                 | Class I:<br>Benefit >>> risk                                                                                                                                                                          | Class IIa:<br>Benefit >> risk                                                                                                                                                                                               | Class IIb:<br>Benefit ≥ risk:                                                                                                                                                                                       | Class III: No benefit<br>OR<br>Class III: Harm                                                                                                                                                                               |
| Description of class                                                                                                      | Procedure or treatment <i>should</i> be performed or administered                                                                                                                                     | Additional studies with focused objectives are needed; it is <i>reasonable</i> to perform the procedure or administer the treatment                                                                                         | Additional studies with broad objectives are needed, and additional registry data would be helpful; procedure or treatment <i>may be considered</i>                                                                 | Procedure or treatment <i>should not</i> be performed or administered because <i>it is not helpful and may be harmful</i>                                                                                                    |
| Level A evidence: Multiple populations evaluated; data derived from multiple RCTs or meta-analyses                        | <ul style="list-style-type: none"> <li>• Recommendation that procedure or treatment is useful or effective</li> <li>• Sufficient evidence from multiple randomized trials or meta-analyses</li> </ul> | <ul style="list-style-type: none"> <li>• Recommendation in favour of treatment or procedure being useful or effective</li> <li>• Some conflicting evidence from multiple randomized trials or meta-analyses</li> </ul>      | <ul style="list-style-type: none"> <li>• Usefulness or efficacy of recommendation is less well established</li> <li>• Greater conflicting evidence from multiple randomized trials or meta-analyses</li> </ul>      | <ul style="list-style-type: none"> <li>• Recommendation that procedure or treatment is not useful or effective and may be harmful</li> <li>• Sufficient evidence from multiple randomized trials or meta-analyses</li> </ul> |
| Level B evidence: Limited populations evaluated; data derived from a single randomized trial or nonrandomized studies     | <ul style="list-style-type: none"> <li>• Recommendation that procedure or treatment is useful or effective</li> <li>• Evidence from single randomized trial or nonrandomized studies</li> </ul>       | <ul style="list-style-type: none"> <li>• Recommendation in favour of treatment or procedure being useful or effective</li> <li>• Some conflicting evidence from single randomized trial or nonrandomized studies</li> </ul> | <ul style="list-style-type: none"> <li>• Usefulness or efficacy of recommendation is less well established</li> <li>• Greater conflicting evidence from single randomized trial or nonrandomized studies</li> </ul> | <ul style="list-style-type: none"> <li>• Recommendation that procedure or treatment is not useful or effective and may be harmful</li> <li>• Evidence from single randomized trial or nonrandomized studies</li> </ul>       |
| Level C evidence: Very limited populations evaluated; only consensus opinion of experts, case studies or standard of care | <ul style="list-style-type: none"> <li>• Recommendation that procedure or treatment is useful or effective</li> <li>• Only expert opinion, case studies or standard of care</li> </ul>                | <ul style="list-style-type: none"> <li>• Recommendation in favour of treatment or procedure being useful or effective</li> <li>• Only diverging expert opinion, case studies or standard of care</li> </ul>                 | <ul style="list-style-type: none"> <li>• Usefulness or efficacy of recommendation is less well established</li> <li>• Only diverging expert opinion, case studies or standard of care</li> </ul>                    | <ul style="list-style-type: none"> <li>• Recommendation that procedure or treatment is not useful or effective and may be harmful</li> <li>• Only expert opinion, case studies or standard of care</li> </ul>                |

Note: RCT = randomized controlled trials.

\*Adapted, with permission, from Jacobs AK, Kushner FG, Ettinger SM, et al. ACCF/AHA clinical practice guideline methodology summit report: a report of the American College of Cardiology foundation/American Heart Association Task Force on Practice Guidelines. *Journal of the American College of Cardiology* 2013;61:213-65. [www.sciencedirect.com/science/journal/07351097](http://www.sciencedirect.com/science/journal/07351097)). © American College of Cardiology Foundation and American Heart Association.
